# Supplementary material for: A Complex Network Important Node Identification Based on the KPDN Method
Source: MDPI journal article supplement (doi:10.3390/app13148303), 2023-07-18
Supplement: s1 [file s1]

Table S1. Robustness of five real-world networks of scale  $10^4$ - $10^5$  under different node removal strategies

|                   | Methods | 0%            | 10%           | 20%           | 30%           | 40%          | 50%          | 60%             | 70%             | 80%             | 90%             | 100%            |
|-------------------|---------|---------------|---------------|---------------|---------------|--------------|--------------|-----------------|-----------------|-----------------|-----------------|-----------------|
| dimacs10-astro-ph | KPD     | 92.51%        | 78.73%        | 62.94%        | 39.40%        | 10.76%       | 0.29%        | 0.10%           | 0.04%           | 0.03%           | 0.02%           | 6.23E-05        |
|                   | KPDN    | <b>92.41%</b> | 70.73%        | <b>34.59%</b> | <b>1.03%</b>  | <b>0.14%</b> | <b>0.04%</b> | <b>0.02%</b>    | <b>0.02%</b>    | <b>0.01%</b>    | <b>6.23E-06</b> | <b>6.23E-06</b> |
|                   | DC      | 92.51%        | 77.23%        | 60.54%        | 60.54%        | 2.46%        | 0.16%        | 0.06%           | 0.03%           | 0.02%           | 0.02%           | 0.01%           |
|                   | KSHELL  | 92.51%        | 80.44%        | 67.14%        | 50.01%        | 30.61%       | 12.01%       | 0.29%           | 0.10%           | 0.04%           | 0.03%           | 0.01%           |
|                   | DWT     | 92.51%        | 75.03%        | 48.49%        | 6.82%         | 0.16%        | 0.08%        | 0.05%           | 0.04%           | 0.03%           | 0.02%           | 0.02%           |
|                   | WL      | 92.51%        | 78.38%        | 63.36%        | 40.93%        | 16.08%       | 1.67%        | 0.19%           | 0.08%           | 0.04%           | 0.03%           | 0.01%           |
|                   | INCC    | 92.51%        | 83.33%        | 73.99%        | 62.45%        | 49.25%       | 34.94%       | 19.91%          | 6.34%           | 0.67%           | 0.04%           | 0.03%           |
|                   | PR      | 92.51%        | <b>70.60%</b> | 37.77%        | 2.70%         | 0.39%        | 0.10%        | 0.06%           | 0.03%           | 0.02%           | 0.01%           | 6.23E-05        |
|                   | Random  | 92.51%        | 81.53%        | 70.65%        | 60.05%        | 49.43%       | 38.58%       | 28.80%          | 19.03%          | 10.22%          | 2.90%           | 0.02%           |
|                   | Methods | 0%            | 10%           | 20%           | 30%           | 40%          | 50%          | 60%             | 70%             | 80%             | 90%             | 100%            |
| ca-Astroph        | KPD     | 95.37%        | 82.23%        | 67.68%        | 47.93%        | 22.56%       | 2.91%        | 0.14%           | 0.05%           | 0.03%           | 0.02%           | 5.33E-05        |
|                   | KPDN    | <b>95.32%</b> | <b>77.57%</b> | <b>54.92%</b> | <b>14.72%</b> | <b>0.21%</b> | <b>0.06%</b> | <b>0.03%</b>    | <b>0.01%</b>    | <b>0.01%</b>    | <b>5.33E-05</b> | <b>5.33E-05</b> |
|                   | DC      | 95.37%        | 81.66%        | 65.68%        | 44.33%        | 15.29%       | 0.48%        | 0.09%           | 0.03%           | 0.02%           | 0.02%           | 0.01%           |
|                   | KSHELL  | 95.37%        | 83.35%        | 69.76%        | 53.88%        | 34.50%       | 15.58%       | 2.02%           | 0.14%           | 0.06%           | 0.02%           | 0.01%           |
|                   | DWT     | 95.37%        | 81.33%        | 60.19%        | 31.31%        | 0.73%        | 0.14%        | 0.08%           | 0.04%           | 0.03%           | 0.02%           | 0.02%           |
|                   | WL      | 95.37%        | 82.24%        | 67.36%        | 48.64%        | 26.02%       | 7.71%        | 0.75%           | 0.11%           | 0.06%           | 0.03%           | 0.01%           |
|                   | INCC    | 95.38%        | 87.03%        | 76.05%        | 64.14%        | 50.97%       | 36.77%       | 22.47%          | 8.15%           | 0.66%           | 0.05%           | 0.02%           |
|                   | PR      | <b>95.32%</b> | 77.77%        | 55.80%        | 24.45%        | 8.20%        | 0.17%        | 0.06%           | 0.03%           | 0.02%           | 0.01%           | 5.33E-05        |
|                   | Random  | 95.37%        | 84.88%        | 74.27%        | 63.56%        | 52.88%       | 42.32%       | 32.03%          | 22.02%          | 12.87%          | 4.66%           | 0.10%           |
|                   | Methods | 0%            | 10%           | 20%           | 30%           | 40%          | 50%          | 60%             | 70%             | 80%             | 90%             | 100%            |
| gottron-reuters   | KPD     | 100.00%       | 78.27%        | 56.39%        | 33.36%        | 9.51%        | 0.07%        | 0.02%           | 2.59E-05        | 2.59E-05        | 2.59E-05        | 2.59E-05        |
|                   | KPDN    | 100.00%       | <b>70.39%</b> | <b>46.10%</b> | <b>24.85%</b> | <b>0.15%</b> | <b>0.00%</b> | <b>2.59E-05</b> | <b>2.59E-05</b> | <b>2.59E-05</b> | <b>2.59E-05</b> | <b>2.59E-05</b> |
|                   | DC      | 100.00%       | 78.14%        | 55.66%        | 31.96%        | 6.43%        | 0.05%        | 0.01%           | 2.59E-05        | 2.59E-05        | 2.59E-05        | 2.59E-05        |
|                   | KSHELL  | 100.00%       | 79.27%        | 58.75%        | 36.60%        | 13.17%       | 0.15%        | 0.02%           | 2.59E-05        | 2.59E-05        | 2.59E-05        | 2.59E-05        |
|                   | DWT     | 100.00%       | 78.17%        | 55.61%        | 31.94%        | 6.79%        | 0.05%        | 0.01%           | 2.59E-05        | 2.59E-05        | 2.59E-05        | 2.59E-05        |
|                   | WL      | 100.00%       | 77.27%        | 57.04%        | 36.84%        | 15.36%       | 2.03%        | 0.02%           | 2.59E-05        | 2.59E-05        | 2.59E-05        | 2.59E-05        |

|                     |                |           |            |            |            |            |            |            |            |            |            |             |
|---------------------|----------------|-----------|------------|------------|------------|------------|------------|------------|------------|------------|------------|-------------|
|                     | INCC           | 99.99%    | 79.08%     | 58.46%     | 39.19%     | 20.07%     | 2.93%      | 0.17%      | 0.16%      | 0.09%      | 0.07%      | 0.03%       |
|                     | PR             | 100.00%   | 74.58%     | 50.21%     | 25.77%     | 1.18%      | 0.02%      | 2.59E-05   | 2.59E-05   | 2.59E-05   | 2.59E-05   | 2.59E-05    |
|                     | Random         | 100.00%   | 87.65%     | 75.46%     | 64.13%     | 53.17%     | 42.55%     | 32.56%     | 22.92%     | 14.17%     | 6.34%      | 0.29%       |
|                     | <b>Methods</b> | <b>0%</b> | <b>10%</b> | <b>20%</b> | <b>30%</b> | <b>40%</b> | <b>50%</b> | <b>60%</b> | <b>70%</b> | <b>80%</b> | <b>90%</b> | <b>100%</b> |
| facebook-wosn-links | KPD            | 99.46%    | 86.90%     | 73.22%     | 57.94%     | 39.59%     | 15.98%     | 0.17%      | 0.02%      | 0.01%      | 3.14E-05   | 1.57E-05    |
|                     | KPDN           | 99.46%    | 83.05%     | 67.56%     | 50.35%     | 26.45%     | 0.09%      | 0.01%      | 3.14E-05   | 1.57E-05   | 1.57E-05   | 1.57E-05    |
|                     | DC             | 99.46%    | 86.81%     | 73.10%     | 57.34%     | 37.83%     | 10.74%     | 0.06%      | 0.02%      | 0.01%      | 3.14E-05   | 1.57E-05    |
|                     | KSHELL         | 99.47%    | 87.02%     | 73.65%     | 59.00%     | 42.38%     | 22.31%     | 4.67%      | 0.04%      | 0.02%      | 3.14E-05   | 1.57E-05    |
|                     | DWT            | 99.46%    | 86.56%     | 72.70%     | 56.51%     | 36.10%     | 9.78%      | 0.08%      | 0.02%      | 0.01%      | 4.71E-05   | 4.71E-05    |
|                     | WL             | 99.46%    | 86.87%     | 73.18%     | 58.21%     | 41.36%     | 22.07%     | 3.33%      | 0.08%      | 0.02%      | 0.02%      | 3.14E-05    |
|                     | INCC           | 99.47%    | 87.70%     | 75.05%     | 61.63%     | 47.22%     | 31.84%     | 15.68%     | 4.19%      | 0.03%      | 0.02%      | 0.01%       |
|                     | PR             | 99.46%    | 84.98%     | 69.87%     | 52.20%     | 29.30%     | 2.87%      | 0.07%      | 1.10E-04   | 3.14E-05   | 1.57E-05   | 1.57E-05    |
|                     | Random         | 99.47%    | 88.04%     | 76.77%     | 65.63%     | 54.73%     | 44.10%     | 33.54%     | 23.36%     | 13.96%     | 5.30%      | 0.04%       |
|                     | <b>Methods</b> | <b>0%</b> | <b>10%</b> | <b>20%</b> | <b>30%</b> | <b>40%</b> | <b>50%</b> | <b>60%</b> | <b>70%</b> | <b>80%</b> | <b>90%</b> | <b>100%</b> |
| prosper-loans       | KPD            | 99.89%    | 85.98%     | 70.29%     | 53.08%     | 34.91%     | 17.73%     | 3.79%      | 2.02E-04   | 5.60E-05   | 3.36E-05   | 1.12E-05    |
|                     | KPDN           | 99.89%    | 81.70%     | 64.19%     | 45.67%     | 25.59%     | 0.46%      | 4.48E-05   | 1.12E-05   | 1.12E-05   | 1.12E-05   | 1.12E-05    |
|                     | DC             | 99.89%    | 85.83%     | 69.97%     | 52.38%     | 33.80%     | 16.17%     | 2.48%      | 1.01E-04   | 5.60E-05   | 3.36E-05   | 2.24E-05    |
|                     | KSHELL         | 99.89%    | 86.68%     | 71.34%     | 54.60%     | 36.55%     | 19.55%     | 5.59%      | 3.14E-04   | 6.72E-05   | 5.60E-05   | 2.24E-05    |
|                     | DWT            | 99.89%    | 85.84%     | 69.96%     | 52.37%     | 33.82%     | 16.19%     | 2.25%      | 1.57E-04   | 5.60E-05   | 3.36E-05   | 2.24E-05    |
|                     | WL             | 99.89%    | 85.78%     | 69.47%     | 50.92%     | 31.93%     | 16.14%     | 4.51%      | 2.46E-04   | 1.01E-04   | 5.60E-05   | 5.60E-05    |
|                     | INCC           | 99.89%    | 87.06%     | 72.84%     | 56.49%     | 39.16%     | 23.07%     | 10.18%     | 9.27%      | 7.15%      | 2.44%      | 0.02%       |
|                     | PR             | 99.89%    | 84.78%     | 68.82%     | 51.58%     | 32.40%     | 11.94%     | 4.26E-04   | 4.48E-05   | 1.12E-05   | 1.12E-05   | 1.12E-05    |
|                     | Random         | 99.89%    | 89.41%     | 78.97%     | 68.60%     | 58.25%     | 47.99%     | 37.71%     | 27.65%     | 17.75%     | 8.01%      | 0.31%       |

Table S2. Efficiency of five real-world networks of scale  $10^4$ - $10^5$  under different node removal strategies

|                   |                |           |            |            |            |            |            |            |            |            |            |             |
|-------------------|----------------|-----------|------------|------------|------------|------------|------------|------------|------------|------------|------------|-------------|
|                   | <b>Methods</b> | <b>0%</b> | <b>10%</b> | <b>20%</b> | <b>30%</b> | <b>40%</b> | <b>50%</b> | <b>60%</b> | <b>70%</b> | <b>80%</b> | <b>90%</b> | <b>100%</b> |
| dimacs10-astro-ph | KPD            | 99.70%    | 44.52%     | 24.68%     | 14.65%     | 8.59%      | 5.02%      | 2.99%      | 1.52%      | 0.74%      | 0.25%      | 0.00%       |
|                   | KPDN           | 99.89%    | 42.42%     | 22.78%     | 11.31%     | 5.68%      | 2.84%      | 1.35%      | 0.49%      | 0.13%      | 0.00%      | 0.00%       |

|                  |                |               |               |               |              |              |              |              |              |              |              |              |
|------------------|----------------|---------------|---------------|---------------|--------------|--------------|--------------|--------------|--------------|--------------|--------------|--------------|
|                  | DC             | 99.70%        | 41.81%        | 23.33%        | 13.46%       | 7.74%        | 4.46%        | 2.50%        | 1.38%        | 0.65%        | 0.17%        | 5.77E-05     |
|                  | KSHELL         | 99.93%        | 55.40%        | 30.60%        | 18.21%       | 11.18%       | 7.01%        | 3.41%        | 1.73%        | 0.76%        | 0.25%        | 5.77E-05     |
|                  | DWT            | 99.70%        | 41.33%        | 23.42%        | 13.67%       | 8.13%        | 4.86%        | 2.95%        | 1.87%        | 1.13%        | 0.40%        | 0.17%        |
|                  | WL             | 99.70%        | 45.71%        | 26.27%        | 15.95%       | 9.80%        | 6.06%        | 3.73%        | 2.35%        | 1.31%        | 0.53%        | 0.08%        |
|                  | INCC           | 99.96%        | 69.14%        | 46.74%        | 29.88%       | 18.11%       | 10.32%       | 5.34%        | 2.46%        | 0.88%        | 0.26%        | 1.40E-04     |
|                  | PR             | 99.73%        | 42.68%        | 23.74%        | 12.63%       | 7.87%        | 4.20%        | 2.01%        | 0.85%        | 0.25%        | 0.01%        | 0.00%        |
|                  | Random         | 99.99%        | 79.79%        | 63.98%        | 49.48%       | 36.33%       | 25.10%       | 15.99%       | 8.86%        | 3.85%        | 0.95%        | 1.40E-04     |
| ca-Astroph       | <b>Methods</b> | <b>0%</b>     | <b>10%</b>    | <b>20%</b>    | <b>30%</b>   | <b>40%</b>   | <b>50%</b>   | <b>60%</b>   | <b>70%</b>   | <b>80%</b>   | <b>90%</b>   | <b>100%</b>  |
|                  | KPD            | 99.75%        | 39.81%        | 21.74%        | 12.43%       | 6.99%        | 3.93%        | 2.18%        | 1.11%        | 0.59%        | 0.16%        | 0.00%        |
|                  | KPDN           | 99.82%        | 39.11%        | <b>19.64%</b> | <b>9.74%</b> | <b>4.70%</b> | <b>2.17%</b> | <b>0.91%</b> | <b>0.29%</b> | <b>0.05%</b> | <b>0.00%</b> | <b>0.00%</b> |
|                  | DC             | <b>99.75%</b> | <b>37.42%</b> | 20.33%        | 11.39%       | 6.29%        | 3.51%        | 1.85%        | 0.97%        | 0.41%        | 0.11%        | 5.05E-06     |
|                  | KSHELL         | 99.96%        | 48.89%        | 26.43%        | 15.13%       | 8.79%        | 5.13%        | 2.82%        | 1.40%        | 0.60%        | 0.14%        | 5.05E-06     |
|                  | DWT            | 99.75%        | 38.25%        | 20.72%        | 11.66%       | 6.84%        | 3.86%        | 2.25%        | 1.32%        | 0.73%        | 0.34%        | 0.12%        |
|                  | WL             | 99.75%        | 40.01%        | 22.86%        | 13.53%       | 8.02%        | 4.78%        | 2.85%        | 1.69%        | 0.96%        | 0.42%        | 0.06%        |
|                  | INCC           | 99.99%        | 71.37%        | 42.86%        | 25.08%       | 14.34%       | 7.89%        | 4.21%        | 1.78%        | 0.62%        | 0.16%        | 2.02E-05     |
|                  | PR             | 99.82%        | 38.36%        | 19.83%        | 9.98%        | 6.08%        | 2.99%        | 1.36%        | 0.54%        | 0.14%        | 3.53E-05     | 0.00%        |
|                  | Random         | 99.98%        | 81.00%        | 64.71%        | 49.55%       | 36.27%       | 25.81%       | 16.78%       | 9.56%        | 4.18%        | 1.17%        | 0.02%        |
| gotttron-reuters | <b>Methods</b> | <b>0%</b>     | <b>10%</b>    | <b>20%</b>    | <b>30%</b>   | <b>40%</b>   | <b>50%</b>   | <b>60%</b>   | <b>70%</b>   | <b>80%</b>   | <b>90%</b>   | <b>100%</b>  |
|                  | KPD            | 98.05%        | 11.42%        | 4.58%         | 1.95%        | 0.63%        | 0.07%        | 1.84E-05     | 0.00%        | 0.00%        | 0.00%        | 0.00%        |
|                  | KPDN           | 98.05%        | 14.86%        | 5.88%         | 1.70%        | <b>0.20%</b> | <b>0.00%</b> | <b>0.00%</b> | <b>0.00%</b> | <b>0.00%</b> | <b>0.00%</b> | <b>0.00%</b> |
|                  | DC             | 98.05%        | 10.84%        | 4.35%         | 1.80%        | 0.54%        | 0.06%        | 1.23E-05     | 0.00%        | 0.00%        | 0.00%        | 0.00%        |
|                  | KSHELL         | 99.97%        | 14.97%        | 5.83%         | 2.43%        | 0.85%        | 0.10%        | 2.66E-05     | 0.00%        | 0.00%        | 0.00%        | 0.00%        |
|                  | DWT            | 98.05%        | 10.78%        | 4.32%         | 1.79%        | 0.55%        | 0.06%        | 1.23E-05     | 0.00%        | 0.00%        | 0.00%        | 0.00%        |
|                  | WL             | 98.05%        | 15.24%        | 6.59%         | 3.05%        | 1.01%        | 0.17%        | 1.53E-05     | 0.00%        | 0.00%        | 0.00%        | 0.00%        |
|                  | INCC           | 99.55%        | 26.18%        | 12.90%        | 6.05%        | 2.18%        | 0.34%        | 0.02%        | 0.02%        | 0.01%        | 0.01%        | 0.00%        |
|                  | PR             | 98.05%        | <b>10.75%</b> | <b>4.06%</b>  | <b>1.43%</b> | 0.35%        | 0.02%        | 0.00%        | 0.00%        | 0.00%        | 0.00%        | 0.00%        |
|                  | Random         | 100.00%       | 80.38%        | 62.75%        | 47.08%       | 34.93%       | 24.69%       | 15.44%       | 8.13%        | 3.75%        | 1.02%        | 0.02%        |
|                  | <b>Methods</b> | <b>0%</b>     | <b>10%</b>    | <b>20%</b>    | <b>30%</b>   | <b>40%</b>   | <b>50%</b>   | <b>60%</b>   | <b>70%</b>   | <b>80%</b>   | <b>90%</b>   | <b>100%</b>  |

|                     |                |               |               |               |              |              |              |              |              |              |              |              |
|---------------------|----------------|---------------|---------------|---------------|--------------|--------------|--------------|--------------|--------------|--------------|--------------|--------------|
| facebook-wosn-links | KPD            | 99.87%        | 36.99%        | 18.79%        | 9.70%        | 4.96%        | 2.49%        | 1.13%        | 0.50%        | 0.12%        | 0.01%        | 0.00%        |
|                     | KPDN           | 99.87%        | 36.91%        | 16.54%        | <b>7.58%</b> | <b>3.30%</b> | <b>1.22%</b> | <b>0.29%</b> | <b>0.02%</b> | <b>0.00%</b> | 0.00%        | 0.00%        |
|                     | DC             | 99.87%        | 35.58%        | 17.57%        | 8.95%        | 4.53%        | 2.24%        | 1.01%        | 0.37%        | 0.08%        | 2.20E-05     | 0.00%        |
|                     | KSHELL         | 99.97%        | 46.13%        | 23.55%        | 12.23%       | 6.09%        | 2.97%        | 1.50%        | 0.67%        | 0.18%        | 2.20E-05     | 0.00%        |
|                     | DWT            | 99.87%        | 35.43%        | 17.49%        | 9.05%        | 4.64%        | 2.29%        | 1.07%        | 0.43%        | 0.14%        | 0.02%        | 0.01%        |
|                     | WL             | 99.87%        | 37.94%        | 19.77%        | 10.53%       | 5.62%        | 2.95%        | 1.47%        | 0.68%        | 0.28%        | 0.09%        | 0.01%        |
|                     | INCC           | 100.00%       | 48.36%        | 26.28%        | 14.17%       | 7.56%        | 3.97%        | 1.95%        | 0.90%        | 0.25%        | 0.07%        | 4.65E-05     |
|                     | PR             | 99.89%        | <b>35.34%</b> | <b>16.05%</b> | 7.59%        | 3.56%        | 1.51%        | 0.52%        | 0.12%        | 0.01%        | 0.00%        | 0.00%        |
|                     | Random         | 100.00%       | 80.62%        | 63.34%        | 48.24%       | 35.69%       | 24.90%       | 15.77%       | 8.95%        | 3.99%        | 1.00%        | 0.01%        |
| prosper-loans       | <b>Methods</b> | <b>0%</b>     | <b>10%</b>    | <b>20%</b>    | <b>30%</b>   | <b>40%</b>   | <b>50%</b>   | <b>60%</b>   | <b>70%</b>   | <b>80%</b>   | <b>90%</b>   | <b>100%</b>  |
|                     | KPD            | 99.80%        | 27.58%        | 11.78%        | 4.99%        | 2.01%        | 0.70%        | 1.89E-03     | 0.03%        | 4.50E-05     | 2.10E-05     | 0.00%        |
|                     | KPDN           | <b>99.80%</b> | <b>29.15%</b> | <b>10.77%</b> | <b>3.68%</b> | <b>1.04%</b> | <b>0.20%</b> | <b>0.01%</b> | <b>0.00%</b> | <b>0.00%</b> | <b>0.00%</b> | <b>0.00%</b> |
|                     | DC             | 99.80%        | 26.78%        | 11.15%        | 4.62%        | 1.81%        | 0.61%        | 1.62E-03     | 0.03%        | 4.38E-05     | 2.01E-05     | 2.10E-06     |
|                     | KSHELL         | 99.98%        | 40.32%        | 15.34%        | 6.25%        | 2.51%        | 0.86%        | 2.29E-03     | 0.04%        | 5.77E-05     | 2.49E-05     | 2.10E-06     |
|                     | DWT            | 99.80%        | 26.76%        | 11.15%        | 4.61%        | 1.81%        | 0.61%        | 1.58E-03     | 0.03%        | 4.50E-05     | 1.89E-05     | 9.01E-07     |
|                     | WL             | 99.80%        | 30.77%        | 13.40%        | 5.61%        | 2.15%        | 0.71%        | 1.76E-03     | 0.03%        | 4.89E-05     | 2.31E-05     | 1.65E-05     |
|                     | INCC           | 99.93%        | 44.43%        | 22.47%        | 10.28%       | 3.99%        | 1.34%        | 0.38%        | 0.35%        | 0.27%        | 0.09%        | 5.56E-05     |
|                     | PR             | 99.80%        | 26.06%        | 10.28%        | 4.06%        | 1.46%        | 0.43%        | 0.09%        | 6.55E-05     | 0.00%        | 0.00%        | 0.00%        |
|                     | Random         | 100.00%       | 81.05%        | 64.43%        | 49.26%       | 36.06%       | 24.98%       | 16.02%       | 9.02%        | 4.04%        | 1.01%        | 0.01%        |

Table S3. Extreme points of node removal subgraph sensitivity on five real-world networks under different strategies

| Methods | dimacs10-astro-ph | ca-Astroph      | gottron-reuters | prosper-loans   | facebook-wosn-links |
|---------|-------------------|-----------------|-----------------|-----------------|---------------------|
| KPD     | 20.9460%          | 26.9032%        | 16.9687%        | 27.9795%        | 31.9860%            |
| KPDN    | <b>11.9718%</b>   | <b>15.9448%</b> | <b>11.9787%</b> | <b>21.9841%</b> | <b>23.9899%</b>     |
| DC      | 20.9460%          | 23.9145%        | 16.9687%        | 27.9795%        | 30.9865%            |
| KSHELL  | 24.9346%          | 29.8919%        | 18.9648%        | 28.9787%        | 32.9855%            |
| DWT     | 15.9604%          | 18.9335%        | 16.9687%        | 27.9795%        | 29.9870%            |

|        |          |          |          |          |          |
|--------|----------|----------|----------|----------|----------|
| WL     | 21.9432% | 23.9145% | 16.9687% | 27.9795% | 30.9865% |
| INCC   | 38.8944% | 42.8427% | 17.9668% | 31.9764% | 35.9841% |
| PR     | 12.9690% | 17.9372% | 13.9747% | 26.9803% | 27.9879% |
| Random | 22.9403% | 32.8805% | 29.9429% | 43.9671% | 31.9860% |

Table S4. Extreme points of sensitivity under different strategies (real-world networks  $10^3$ - $10^4$ )

| Methods  | email-univ      | US-airports    | power-eris1176 | bio-grid-worm  | p2p-Gnutella08  | fb-pages-government |
|----------|-----------------|----------------|----------------|----------------|-----------------|---------------------|
| KPD      | 21.4475%        | 7.6874%        | 11.3095%       | <b>1.0265%</b> | 22.0124%        | 31.7557%            |
| KPDN     | <b>18.5349%</b> | <b>3.8755%</b> | <b>1.0204%</b> | <b>1.0265%</b> | <b>11.0141%</b> | <b>27.7880%</b>     |
| Degree   | 23.3892%        | 7.6874%        | 8.5034%        | <b>1.0265%</b> | 18.0130%        | 33.7395%            |
| K-shell  | 27.2727%        | 9.5934%        | 11.3095%       | 2.0245%        | 25.0119%        | 37.7072%            |
| CC       | 26.3019%        | 6.7344%        | 4.7619%        | <b>1.0265%</b> | 24.0121%        | 36.7153%            |
| DWT      | 20.4766%        | 5.7814%        | 6.6327%        | 1.0265%        | 18.0130%        | 27.7880%            |
| CI       | 21.4475%        | 7.6874%        | 11.3095%       | <b>1.0265%</b> | 23.0122%        | 31.7557%            |
| WL       | 21.4475%        | 7.6874%        | 11.3095%       | <b>1.0265%</b> | 23.0122%        | 33.7395%            |
| HC       | 27.2727%        | 4.8285%        | 12.2449%       | <b>1.0265%</b> | 24.0121%        | 34.7315%            |
| INCC     | 32.1271%        | 6.7344%        | 2.8912%        | 7.0145%        | 20.0127%        | 40.6830%            |
| Pagerank | 21.4475%        | <b>3.8755%</b> | 5.6973%        | <b>1.0265%</b> | 12.0140%        | 30.7638%            |
| random   | 34.0688%        | 32.4651%       | 14.1156%       | 25.9766%       | 26.0117%        | 48.6184%            |
